# Supplementary material for: Influence of porosity on osteogenesis, bone growth and osteointegration in trabecular tantalum scaffolds fabricated by additive manufacturing
Source: PubMed Central journal article supplement (PMC9911888; doi:10.3389/fbioe.2023.1117954), 2023-01-27
Supplement: Image1.pdf [file Image1.pdf]

## Supplemental information

### **Influence of porosity on osteogenesis, bone growth and osteointegration in trabecular tantalum scaffolds fabricated by additive manufacturing**

Juyang Jiao<sup>a,1</sup>, Qimin Hong<sup>a,1</sup>, Dachen Zhang<sup>c,d</sup>, Minqi Wang<sup>a</sup>, Haozheng Tang<sup>a</sup>, Jingzhou Yang<sup>b,c,d,\*</sup>, Xinhua Qu<sup>a,\*</sup>, Bing Yue<sup>a,\*</sup>

<sup>a</sup> Department of Bone and Joint Surgery, Department of Orthopedics, Renji Hospital Shanghai Jiao Tong University School of Medicine, Shanghai, PR China

<sup>b</sup> School of Mechanical & Automobile Engineering, Qingdao University of Technology, Qingdao, Shandong, PR China

<sup>c</sup> Shenzhen Dazhou Medical Technology Co, Ltd., Shenzhen, Guangdong, PR China

<sup>d</sup> Center of Biomedical Materials 3D Printing, National Engineering Laboratory for Polymer Complex Structure Additive Manufacturing, Baoding, Hebei, PR China

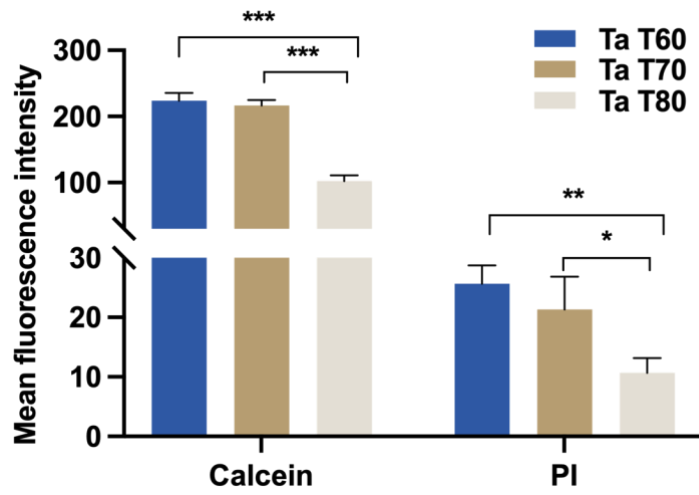

Figure S1. Quantitative analysis of the fluorescence intensity of live/dead cells on different porous tantalum scaffolds. Data represent mean  $\pm$  SD. (n = 3, \*P < 0.05; \*\*P < 0.01; \*\*\*P < 0.001).
